# Supplementary material
Source: publisher figshare collection journal article supplement (https://acs.figshare.com/ndownloader/files/9362737)

# Supporting Information for “Kohn–Sham decomposition in real-time time-dependent density-functional theory: An efficient tool for analyzing plasmonic excitations”

T. P. Rossi,<sup>1,\*</sup> M. Kuisma,<sup>2,3,†</sup> M. J. Puska,<sup>1</sup> R. M. Nieminen,<sup>1</sup> and P. Erhart<sup>2,‡</sup>

<sup>1</sup>*COMP Centre of Excellence, Department of Applied Physics,  
Aalto University School of Science, Espoo, Finland*

<sup>2</sup>*Department of Physics, Chalmers University of Technology, Gothenburg, Sweden*

<sup>3</sup>*Department of Chemistry, Nanoscience Center, University of Jyväskylä, Jyväskylä, Finland*

\*[tuomas.rossi@alumni.aalto.fi](mailto:tuomas.rossi@alumni.aalto.fi) †[mikael.j.kuisma@jyu.fi](mailto:mikael.j.kuisma@jyu.fi) ‡[erhart@chalmers.se](mailto:erhart@chalmers.se)

## S1 Derivation of Eq. (9) within the PAW formalism

Within the PAW formalism [P. E. Blöchl, *Phys. Rev. B* **50**, 17953 (1994)], Eq. (1) reads

$$i\mathcal{T}^\dagger \mathcal{T} \frac{\partial}{\partial t} \tilde{\psi}_n(\mathbf{r}, t) = \mathcal{T}^\dagger H_{\text{KS}}(t) \mathcal{T} \tilde{\psi}_n(\mathbf{r}, t), \quad (\text{S1})$$

where  $\tilde{\psi}_n(\mathbf{r}, t)$  is a pseudo wave function and  $\mathcal{T}$  denotes the PAW transformation operator.

In the LCAO method, the pseudo wave function  $\tilde{\psi}_n(\mathbf{r}, t)$  is expanded in localized basis functions  $\tilde{\phi}_\mu(\mathbf{r})$  centered at atomic coordinates

$$\tilde{\psi}_n(\mathbf{r}, t) = \sum_\mu \tilde{\phi}_\mu(\mathbf{r}) C_{\mu n}(t), \quad (\text{S2})$$

with expansion coefficients  $C_{\mu n}(t)$ . The corresponding all-electron wave function is given by [compare to Eq. (7)]

$$\psi_n(\mathbf{r}, t) = \mathcal{T} \tilde{\psi}_n(\mathbf{r}, t) = \sum_\mu \phi_\mu(\mathbf{r}) C_{\mu n}(t), \quad (\text{S3})$$

where the all-electron basis functions have been defined as  $\phi_\mu = \mathcal{T} \tilde{\phi}_\mu$ .

The time-dependent all-electron real-space KS density matrix can be obtained as

$$\rho(\mathbf{r}, \mathbf{r}', t) = \sum_{\mu\nu} \phi_\mu(\mathbf{r}) \rho_{\mu\nu}(t) \phi_\nu^*(\mathbf{r}'), \quad (\text{S4})$$

where the KS density matrix in the LCAO basis  $\rho_{\mu\nu}(t)$  is given by Eq. (8).

The transformation of the real-space KS density matrix to the basis defined by the ground-state KS orbitals  $\psi_n^{(0)}(\mathbf{r})$ , see Eq. (3), is given by

$$\rho_{nn'}(t) = \int d\mathbf{r} \int d\mathbf{r}' \psi_n^{(0)*}(\mathbf{r}) \rho(\mathbf{r}, \mathbf{r}', t) \psi_{n'}^{(0)}(\mathbf{r}'). \quad (\text{S5})$$

By expanding  $\psi_n^{(0)}(\mathbf{r})$  in the LCAO basis as in Eq. (S3) and inserting Eq. (S4) into Eq. (S5), we obtain after re-ordering the integrals

$$\begin{aligned} \rho_{nn'}(t) = & \sum_\mu C_{\mu n}^{(0)*} \underbrace{\sum_{\mu'} \int d\mathbf{r} \phi_\mu^*(\mathbf{r}) \phi_{\mu'}(\mathbf{r})}_{S_{\mu\mu'}} \\ & \cdot \sum_{\nu'} \rho_{\mu'\nu'}(t) \underbrace{\sum_\nu \int d\mathbf{r}' \phi_{\nu'}^*(\mathbf{r}') \phi_\nu(\mathbf{r}')}_{S_{\nu\nu'}^*} C_{\nu n'}^{(0)}. \end{aligned} \quad (\text{S6})$$

Here, we have isolated the overlap integrals  $S_{\mu\mu'}$  used regularly in LCAO calculations, *i.e.*,

$$S_{\mu\mu'} = \int d\mathbf{r} \phi_\mu^*(\mathbf{r}) \phi_{\mu'}(\mathbf{r}) = \int d\mathbf{r} \tilde{\phi}_\mu^*(\mathbf{r}) \mathcal{T}^\dagger \mathcal{T} \tilde{\phi}_{\mu'}(\mathbf{r}). \quad (\text{S7})$$

After simplifying the overlap integrals in Eq. (S6), we obtain Eq. (9). We note that the PAW transformation affects only the evaluation of the overlap integrals  $S_{\mu\mu'}$ , see Eq. (S7).

## S2 Additional transition contribution maps for Ag<sub>55</sub>

On the following pages, we present the transition contribution maps (TCMs) for the Ag<sub>55</sub> nanoparticle from  $\omega = 3.66$  eV to  $\omega = 4.25$  eV in steps of 0.01 eV. All TCMs use the same color scale (see the main text for definitions).

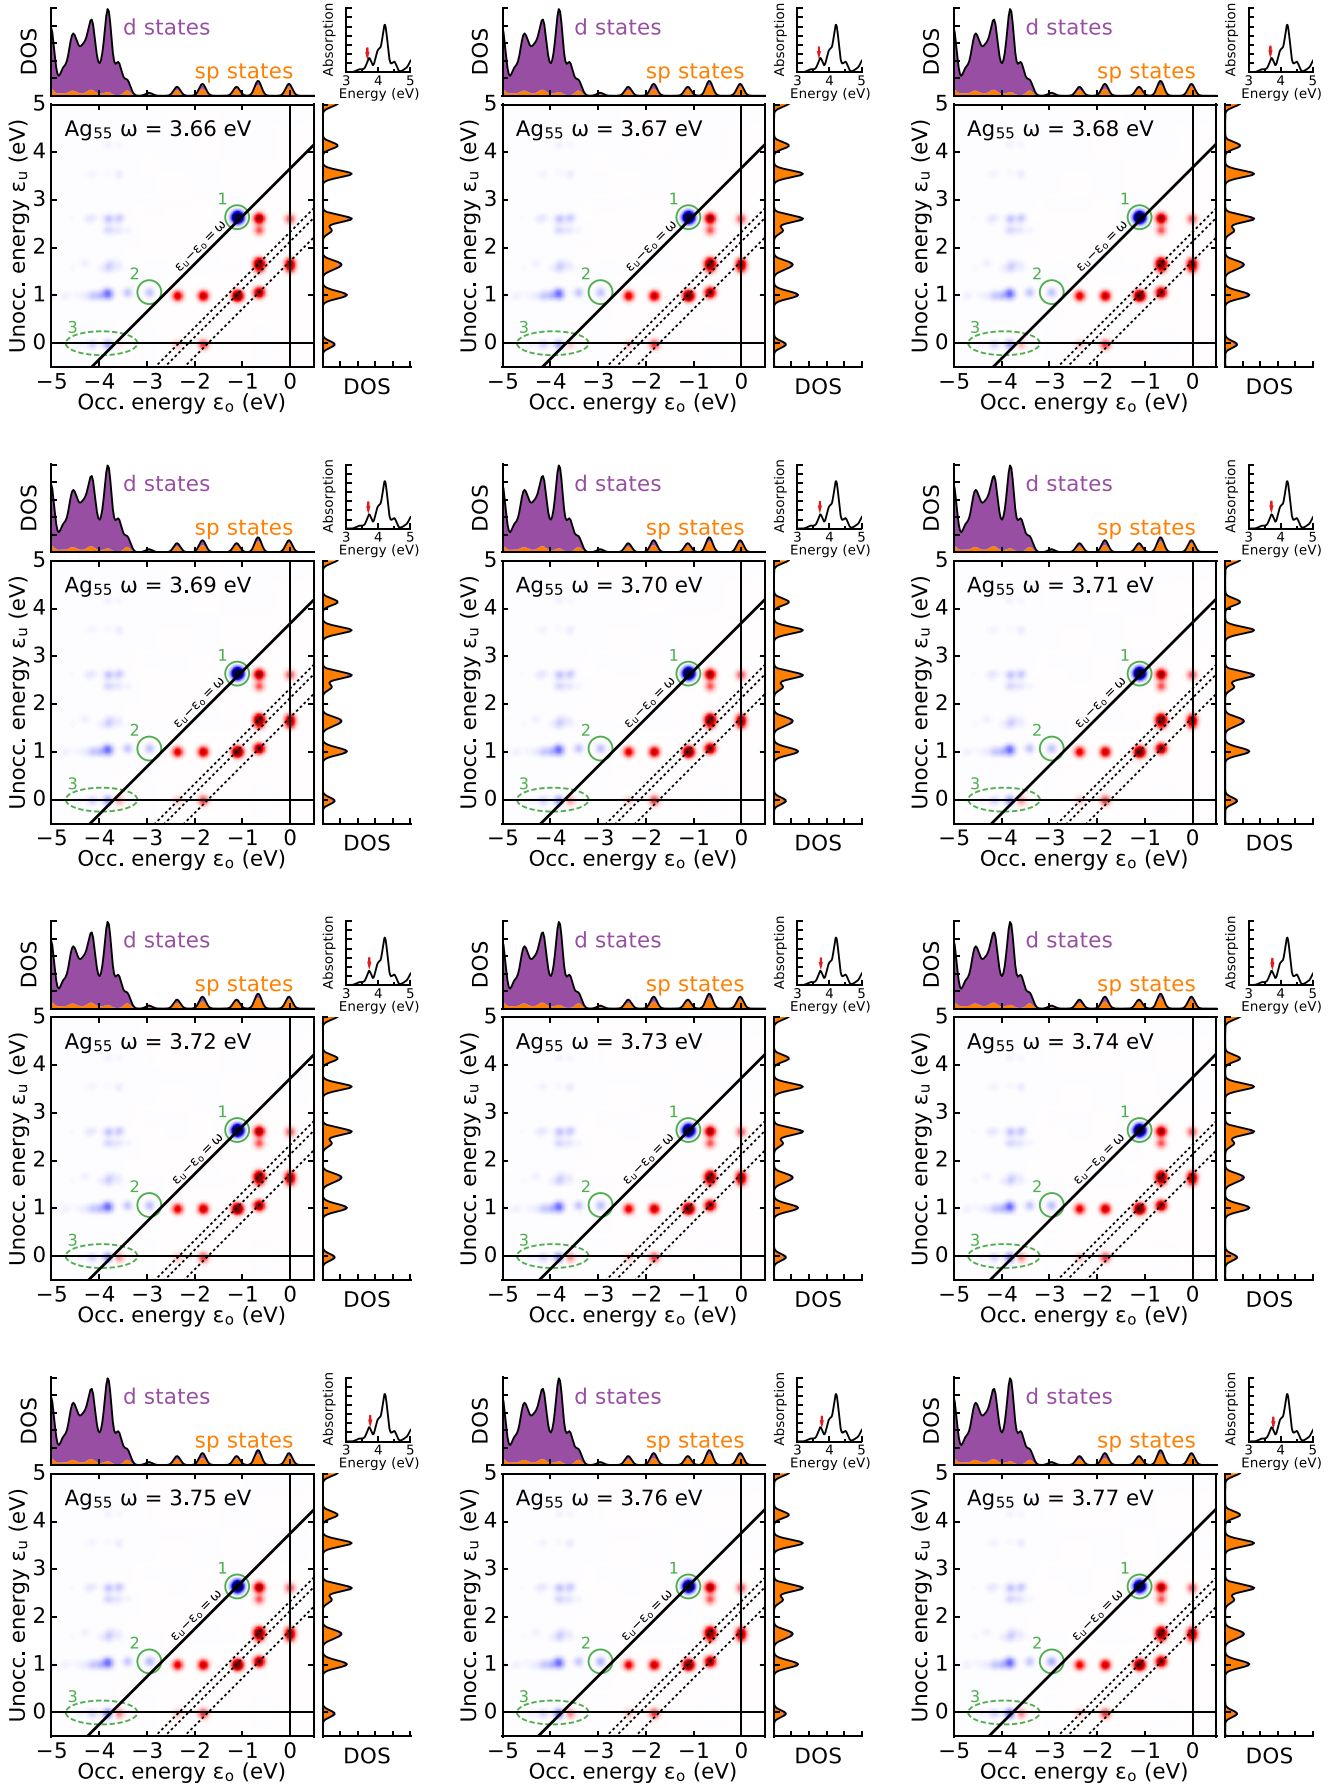

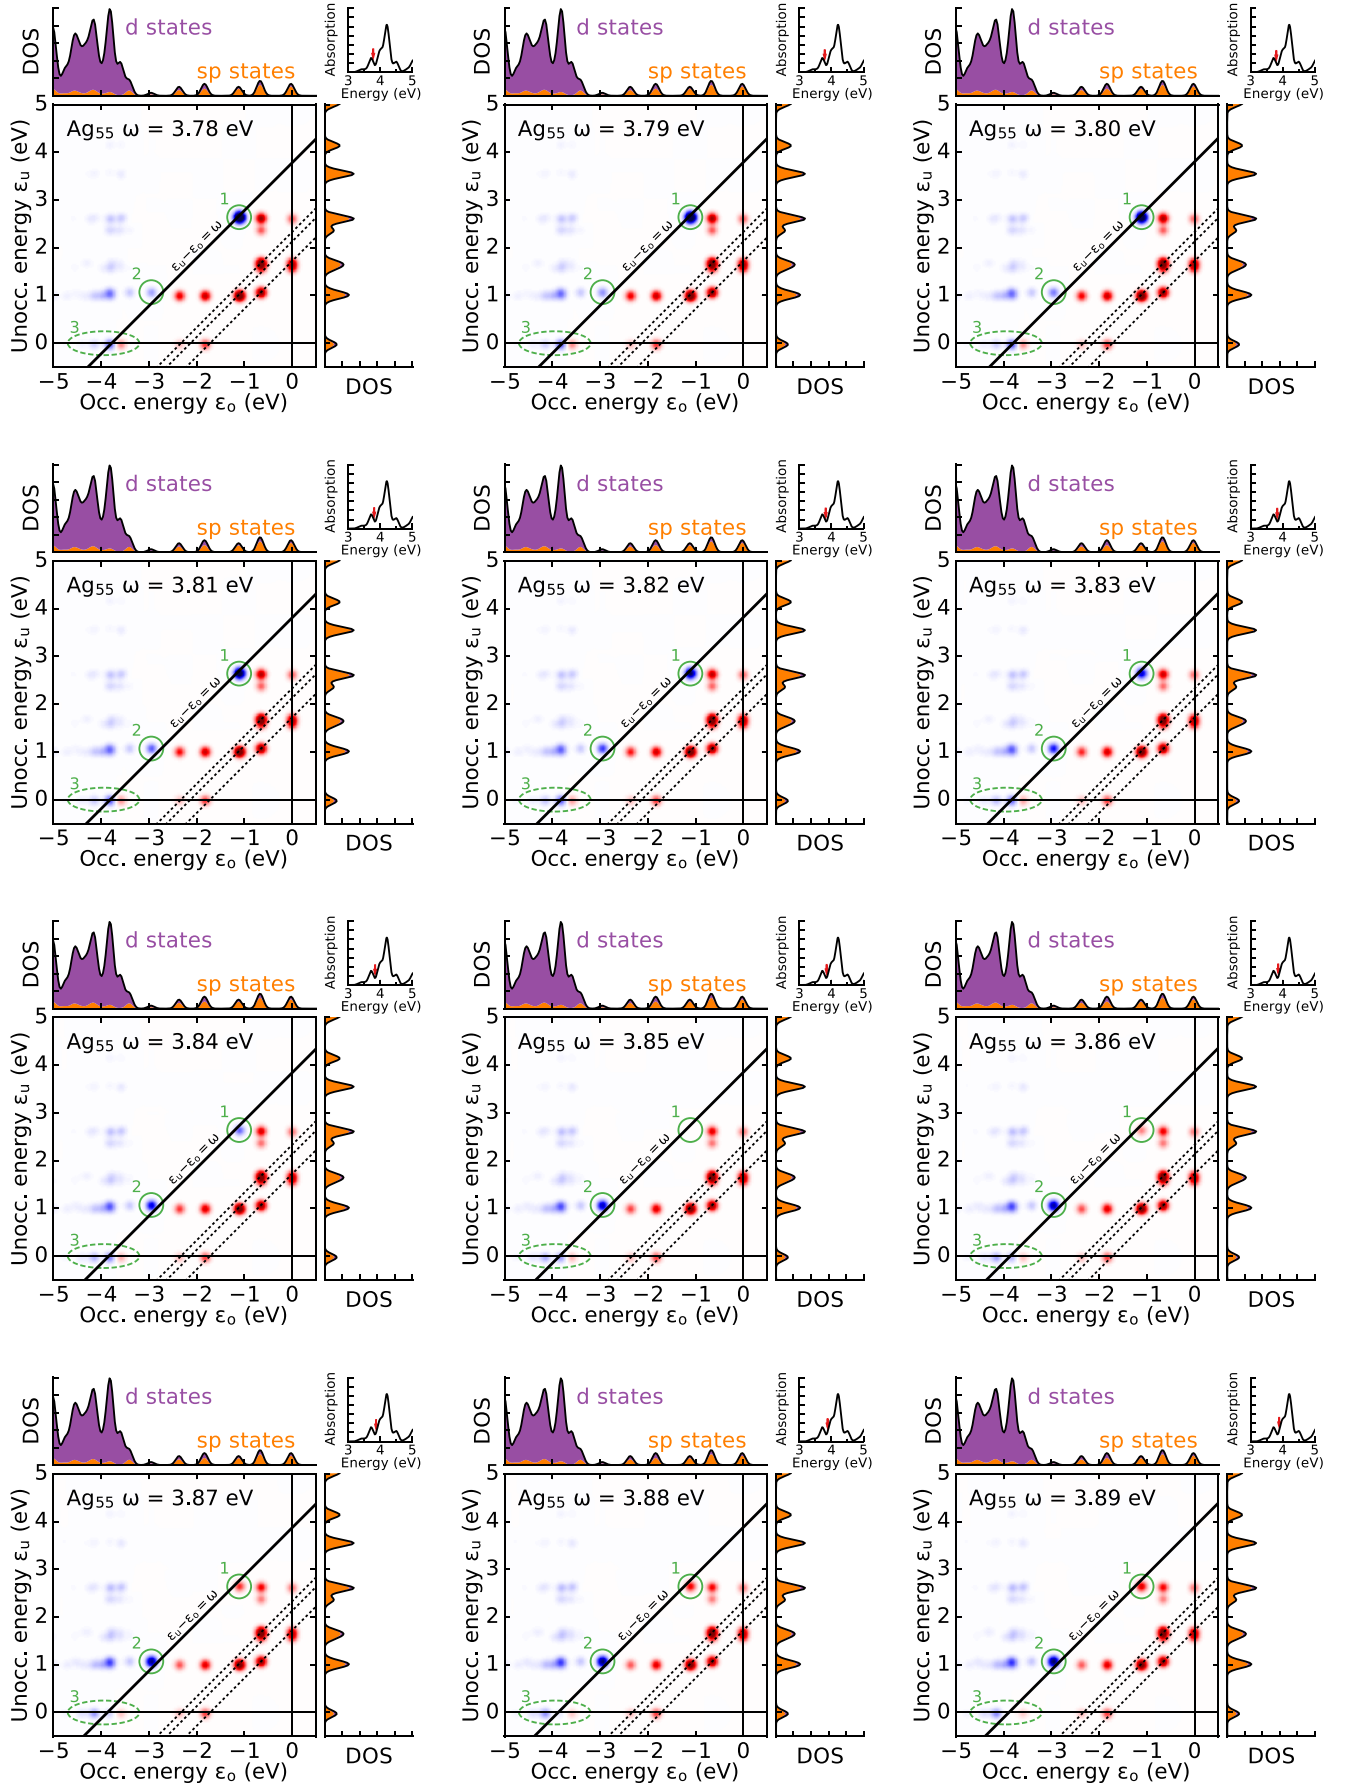

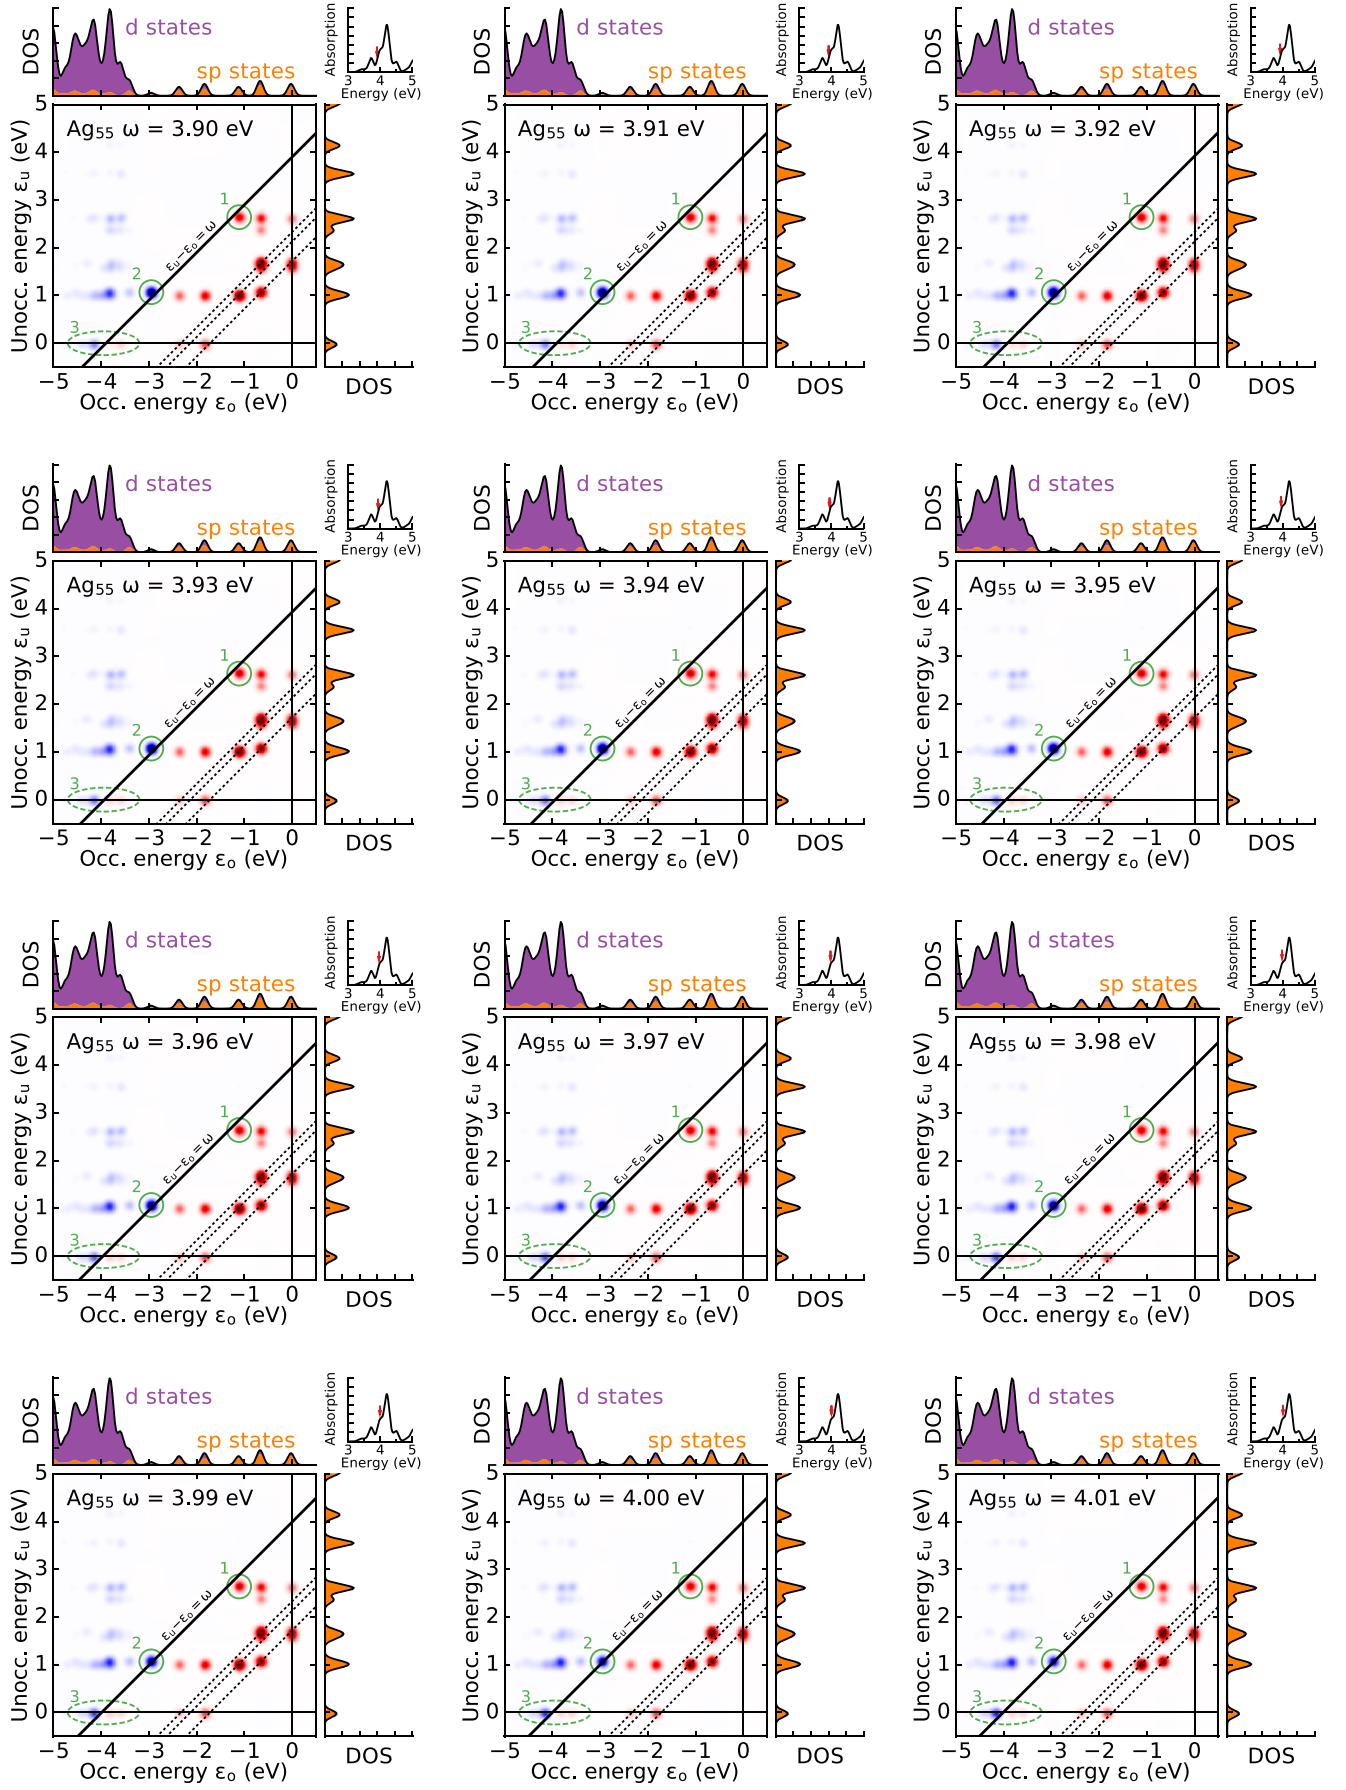

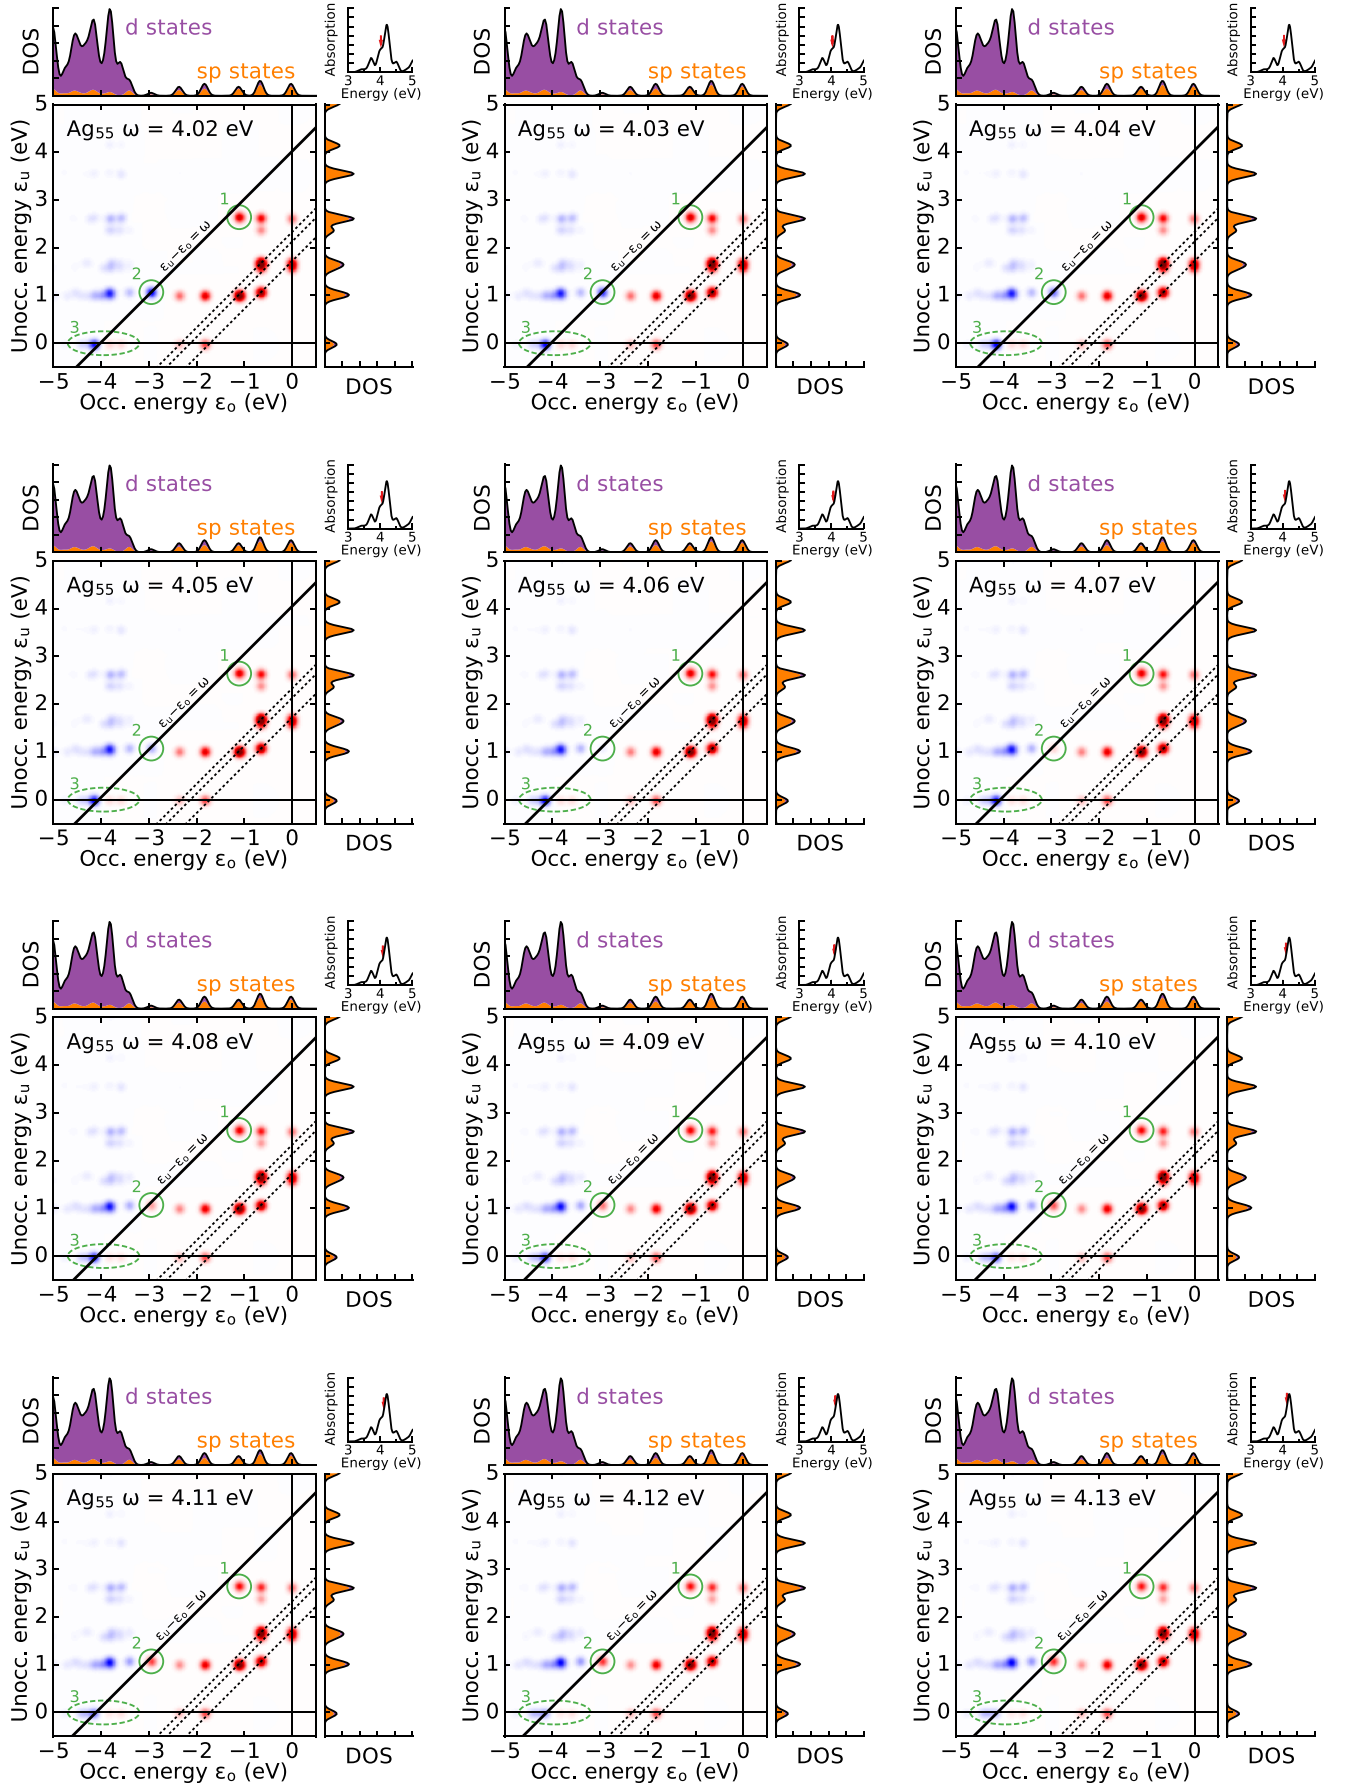

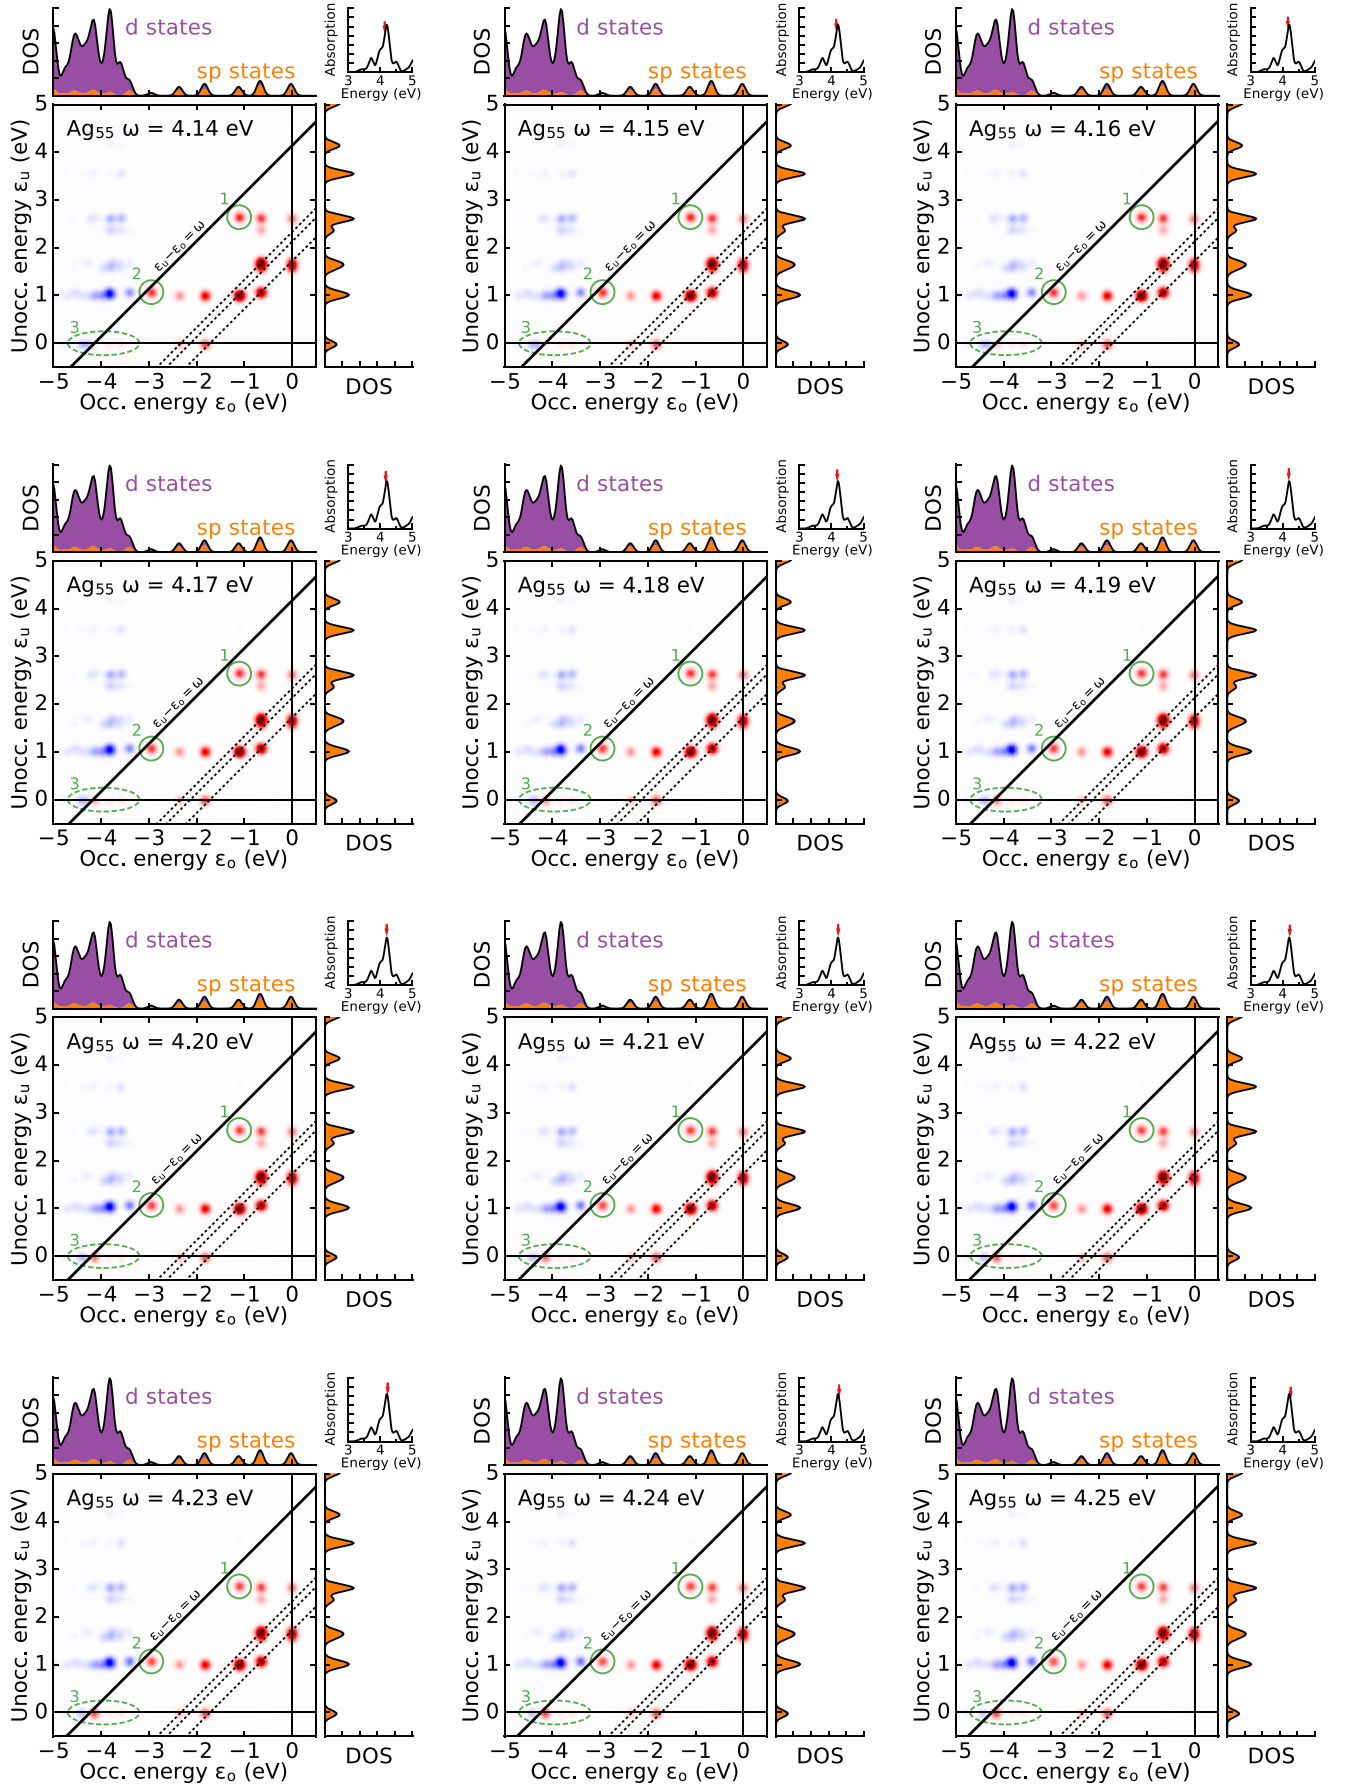

Supplement: Supplementary file 1 [file 9362737]
